# Supplementary material for: Decrypting protein surfaces by combining evolution, geometry, and molecular docking
Source: PubMed Central journal article supplement (PMC6852240; doi:10.1002/prot.25757), 2019-06-26
Supplement: PROT-87-952-s001.pdf [file PROT-87-952-s001.pdf]

# SUPPORTING INFORMATION

## Decrypting protein surfaces by combining evolution, geometry and molecular docking short title: Protein surface multi-usage and deformability

Chloé Dequeker<sup>1</sup>, Elodie Laine<sup>1,\*</sup> and Alessandra Carbone<sup>1,2,\*</sup>

<sup>1</sup> Sorbonne Université, CNRS, IBPS,

Laboratoire de Biologie Computationnelle et Quantitative (LCQB), 75005 Paris, France.

<sup>2</sup> Institut Universitaire de France (IUF), Paris, France.

\* corresponding authors: elodie.laine@upmc.fr, alessandra.carbone@lip6.fr

Table S1: List of proteins in the P-262 dataset.

| PDB  | resolution (Å) | chain | class | #(residues) |
|------|----------------|-------|-------|-------------|
| 1aox | 2.10           | A     | R     | 201         |
|      |                | B     | R     | 201         |
| 1apy | 2.00           | A     | E     | 161         |
|      |                | B     | E     | 141         |
| 1atn | 2.80           | A     | S     | 371         |
|      |                | D     | E     | 258         |
| 1avf | 2.36           | A     | E     | 322         |
|      |                | P     | E     | 21          |
| 1avo | 2.80           | A     | ER    | 60          |
|      |                | B     | ER    | 140         |
| 1ck4 | 2.20           | A     | R     | 193         |
|      |                | B     | R     | 195         |
| 1d8d | 2.00           | A     | E     | 323         |
|      |                | B     | E     | 407         |
| 1efl | 1.90           | A     | O     | 289         |
|      |                | C     | O     | 87          |
| 1efv | 2.10           | A     | O     | 312         |
|      |                | B     | O     | 252         |
| 1ezx | 2.60           | A     | SI    | 335         |
|      |                | B     | SI    | 36          |
|      |                | C     | E     | 140         |
| 1f9e | 2.90           | A     | E     | 153         |
|      |                | B     | E     | 89          |
| 1fnt | 3.20           | A     | C     | 238         |
|      |                | B     | C     | 247         |
|      |                | F     | C     | 233         |
|      |                | H     | C     | 196         |
|      |                | J     | C     | 204         |
|      |                | N     | C     | 233         |
| 1gc1 | 2.50           | C     | S     | 181         |
|      |                | G     | S     | 297         |
| 1gl4 | 2.00           | A     | O     | 273         |
|      |                | B     | S     | 89          |
| 1h2k | 2.15           | A     | E     | 332         |
|      |                | S     | O     | 24          |
| 1h6v | 3.00           | A     | E     | 490         |
|      |                | B     | E     | 487         |
|      |                | C     | E     | 482         |
|      |                | E     | E     | 491         |
| 1i7x | 3.00           | A     | O     | 522         |
|      |                | B     | O     | 57          |
|      |                | C     | O     | 521         |

Continued

| PDB  | resolution | chain | class | #(residues) |
|------|------------|-------|-------|-------------|
| 1ibc | 2.73       | A     | E     | 167         |
|      |            | B     | E     | 88          |
| 1iw0 | 1.40       | A     | E     | 207         |
|      |            | B     | E     | 209         |
|      |            | C     | E     | 207         |
| 1jjo | 3.06       | A     | O     | 40          |
|      |            | C     | O     | 244         |
|      |            | E     | O     | 33          |
| 1kfu | 2.50       | L     | E     | 699         |
|      |            | S     | ER    | 184         |
| 1ku6 | 2.50       | A     | E     | 535         |
|      |            | B     | SI    | 61          |
| 1ldk | 3.10       | A     | C     | 358         |
|      |            | B     | C     | 366         |
| 1li1 | 1.90       | A     | S     | 228         |
|      |            | B     | S     | 227         |
|      |            | C     | S     | 224         |
|      |            | F     | S     | 225         |
| 1lm5 | 1.80       | A     | O     | 189         |
|      |            | B     | O     | 193         |
| 1lya | 2.50       | A     | E     | 97          |
|      |            | B     | E     | 241         |
| 1m3d | 2.00       | A     | S     | 223         |
|      |            | B     | S     | 224         |
|      |            | C     | S     | 222         |
|      |            | D     | S     | 225         |
|      |            | E     | S     | 224         |
|      |            | F     | S     | 223         |
|      |            | G     | S     | 225         |
|      |            | H     | S     | 224         |
| L    | S          | 222   |       |             |
| 1mhw | 1.90       | A     | E     | 173         |
|      |            | C     | E     | 41          |
| 1nci | 2.10       | A     | O     | 102         |
|      |            | B     | O     | 96          |
| 1nme | 1.60       | A     | E     | 146         |
|      |            | B     | E     | 92          |
| 1nt2 | 2.90       | A     | E     | 209         |
|      |            | B     | O     | 236         |
| 1pyo | 1.65       | A     | E     | 159         |
|      |            | B     | E     | 98          |
| 1r4m | 3.00       | B     | E     | 418         |
|      |            | I     | O     | 76          |
| 1rf3 | 3.50       | A     | E     | 192         |
|      |            | B     | R     | 24          |

Continued

| PDB  | resolution | chain | class | #(residues) |
|------|------------|-------|-------|-------------|
| 1rkc | 2.70       | A     | O     | 258         |
|      |            | B     | O     | 26          |
| 1rvf | 4.00       | 2     | S     | 255         |
|      |            | 3     | S     | 236         |
|      |            | 4     | S     | 40          |
| 1shw | 2.20       | A     | SI    | 138         |
|      |            | B     | R     | 181         |
| 1us7 | 2.30       | A     | O     | 207         |
|      |            | B     | O     | 194         |
| 1vyh | 3.40       | A     | E     | 218         |
|      |            | C     | ER    | 310         |
| 1wsu | 2.30       | A     | TF    | 124         |
|      |            | B     | TF    | 122         |
|      |            | C     | TF    | 102         |
|      |            | D     | TF    | 121         |
| 1y8n | 2.60       | A     | E     | 374         |
|      |            | B     | E     | 97          |
| 1ya5 | 2.44       | A     | O     | 198         |
|      |            | T     | O     | 89          |
| 1ydi | 1.80       | A     | O     | 256         |
|      |            | B     | O     | 24          |
| 1yk1 | 2.90       | A     | R     | 394         |
|      |            | E     | SI    | 21          |
| 1yy9 | 2.60       | C     | AB    | 211         |
|      |            | D     | AB    | 220         |
| 2bdn | 2.53       | H     | AB    | 217         |
|      |            | L     | AB    | 214         |
| 2bov | 2.66       | A     | ER    | 174         |
|      |            | B     | E     | 208         |
| 2c0l | 2.30       | A     | R     | 292         |
|      |            | B     | O     | 122         |
| 2c35 | 2.70       | A     | E     | 129         |
|      |            | B     | E     | 171         |
| 2c63 | 2.15       | A     | O     | 233         |
|      |            | B     | O     | 233         |
|      |            | C     | O     | 233         |
|      |            | D     | O     | 233         |
| 2c74 | 2.70       | A     | O     | 235         |
|      |            | B     | O     | 234         |
| 2c9w | 1.90       | A     | O     | 153         |
|      |            | C     | TF    | 80          |
| 2d1x | 1.90       | A     | O     | 60          |
|      |            | B     | O     | 59          |
|      |            | C     | O     | 66          |

Continued

| PDB  | resolution | chain | class | #(residues) |
|------|------------|-------|-------|-------------|
| 2djg | 2.05       | A     | E     | 114         |
|      |            | B     | E     | 161         |
|      |            | C     | E     | 68          |
| 2dvw | 2.30       | A     | ER    | 229         |
|      |            | B     | ER    | 73          |
| 2e9w | 3.50       | A     | R     | 468         |
|      |            | C     | SI    | 132         |
| 2e9x | 2.30       | A     | C     | 144         |
|      |            | B     | C     | 175         |
|      |            | C     | C     | 186         |
|      |            | D     | C     | 197         |
| 2gd4 | 3.30       | H     | O     | 234         |
|      |            | L     | O     | 54          |
| 2gez | 2.60       | B     | E     | 133         |
|      |            | C     | E     | 166         |
| 2gix | 2.02       | A     | R     | 206         |
|      |            | B     | R     | 201         |
|      |            | D     | R     | 205         |
| 2h0d | 2.50       | A     | C     | 97          |
|      |            | B     | E     | 100         |
| 2i1n | 1.85       | A     | O     | 101         |
|      |            | B     | O     | 102         |
| 2i32 | 2.70       | A     | O     | 154         |
|      |            | E     | ER    | 21          |
| 2iae | 3.50       | A     | ER    | 583         |
|      |            | B     | ER    | 376         |
| 2jjs | 1.85       | A     | R     | 116         |
|      |            | C     | I     | 115         |
| 2jz3 | NaN        | B     | TF    | 118         |
|      |            | C     | TF    | 96          |
| 2nl9 | 1.55       | A     | O     | 140         |
|      |            | B     | O     | 23          |
| 2nna | 2.10       | A     | I     | 182         |
|      |            | B     | I     | 182         |
| 2nnw | 2.70       | A     | C     | 350         |
|      |            | B     | E     | 227         |
| 2nvu | 2.80       | B     | E     | 789         |
|      |            | C     | E     | 176         |
| 2o8a | 2.61       | A     | E     | 295         |
|      |            | I     | SI    | 59          |
| 2odb | 2.40       | A     | E     | 177         |
|      |            | B     | E     | 35          |
| 2ot3 | 2.10       | A     | G     | 253         |
|      |            | B     | E     | 157         |

Continued

| PDB  | resolution | chain | class | #(residues) |
|------|------------|-------|-------|-------------|
| 2p1m | 1.80       | A     | O     | 90          |
|      |            | B     | R     | 567         |
| 2pav | 1.80       | A     | S     | 361         |
|      |            | P     | S     | 139         |
| 2pjy | 3.00       | A     | O     | 112         |
|      |            | B     | R     | 108         |
|      |            | C     | R     | 79          |
| 2q7n | 4.00       | A     | R     | 480         |
|      |            | B     | SI    | 180         |
| 2r9p | 1.40       | A     | E     | 224         |
|      |            | E     | SI    | 58          |
| 2rgn | 3.50       | A     | G     | 324         |
|      |            | B     | G     | 327         |
|      |            | C     | G     | 177         |
| 2rhk | 1.95       | A     | O     | 119         |
|      |            | C     | SI    | 63          |
| 2uzi | 2.00       | H     | AB    | 114         |
|      |            | L     | AB    | 104         |
| 2v17 | 1.65       | H     | AB    | 222         |
|      |            | L     | AB    | 214         |
| 2v8q | 2.10       | A     | E     | 102         |
|      |            | B     | E     | 73          |
|      |            | E     | E     | 304         |
| 2vgl | 2.59       | A     | C     | 600         |
|      |            | B     | C     | 579         |
|      |            | M     | C     | 396         |
|      |            | S     | C     | 142         |
| 2vp7 | 1.65       | A     | O     | 66          |
|      |            | B     | O     | 33          |
| 2z3q | 1.85       | B     | R     | 81          |
|      |            | C     | SI    | 117         |
| 2z5h | 2.89       | B     | O     | 51          |
|      |            | I     | O     | 39          |
|      |            | T     | O     | 34          |
| 2zch | 2.83       | H     | AB    | 229         |
|      |            | L     | AB    | 215         |
|      |            | P     | I     | 237         |
| 2z11 | 2.00       | A     | O     | 119         |
|      |            | B     | O     | 116         |
| 3bc1 | 1.80       | B     | O     | 52          |
|      |            | E     | G     | 175         |
| 3bes | 2.20       | L     | SI    | 133         |
|      |            | R     | O     | 250         |
| 3bpl | 2.93       | B     | R     | 202         |
|      |            | C     | R     | 194         |

Continued

| PDB  | resolution | chain | class | #(residues) |
|------|------------|-------|-------|-------------|
| 3brw | 3.40       | B     | G     | 337         |
|      |            | D     | G     | 167         |
| 3bs5 | 2.00       | A     | O     | 83          |
|      |            | B     | G     | 74          |
| 3bt2 | 2.50       | A     | E     | 124         |
|      |            | B     | O     | 40          |
|      |            | H     | AB    | 212         |
|      |            | L     | AB    | 211         |
|      |            | U     | R     | 259         |
| 3byh | 12.00      | A     | S     | 374         |
|      |            | B     | S     | 231         |
| 3c08 | 2.15       | H     | AB    | 217         |
|      |            | L     | AB    | 206         |
| 3c5j | 1.80       | A     | I     | 178         |
|      |            | B     | I     | 182         |
| 3c66 | 2.60       | A     | E     | 529         |
|      |            | C     | O     | 24          |
| 3ch5 | 2.10       | A     | G     | 193         |
|      |            | B     | O     | 37          |
| 3cwb | 3.51       | A     | C     | 443         |
|      |            | B     | C     | 421         |
|      |            | D     | O     | 241         |
|      |            | E     | C     | 196         |
|      |            | F     | C     | 100         |
|      |            | H     | C     | 70          |
|      |            | J     | C     | 61          |
|      |            | P     | O     | 379         |
| T    | C          | 79    |       |             |
| 3d0g | 2.80       | A     | E     | 597         |
|      |            | E     | O     | 173         |
| 3d1m | 1.70       | A     | O     | 148         |
|      |            | D     | O     | 99          |
| 3d2u | 2.21       | A     | E     | 281         |
|      |            | B     | O     | 99          |
| 3d48 | 2.50       | P     | SI    | 165         |
|      |            | R     | R     | 195         |
| 3d85 | 1.90       | A     | AB    | 213         |
|      |            | B     | AB    | 216         |
|      |            | C     | SI    | 133         |
|      |            | D     | SI    | 290         |
| 3dgc | 2.50       | M     | SI    | 141         |
|      |            | S     | R     | 207         |

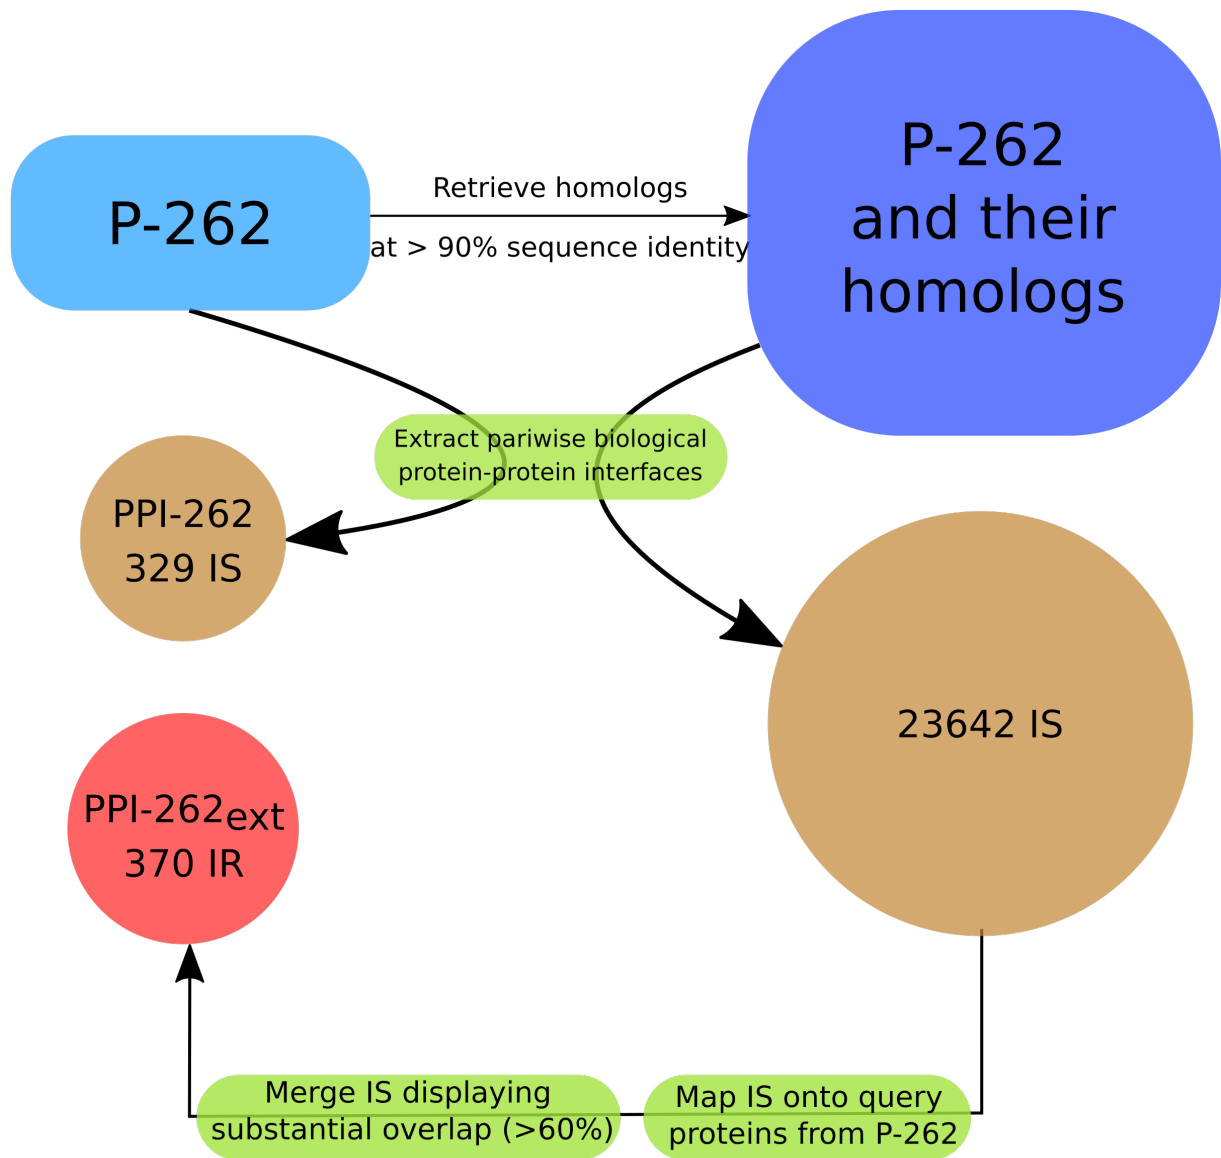

IS: Interaction Sites  
IR: Interaction Regions

Figure S1: Schematic representation of the protocol applied to collect interacting sites and regions.



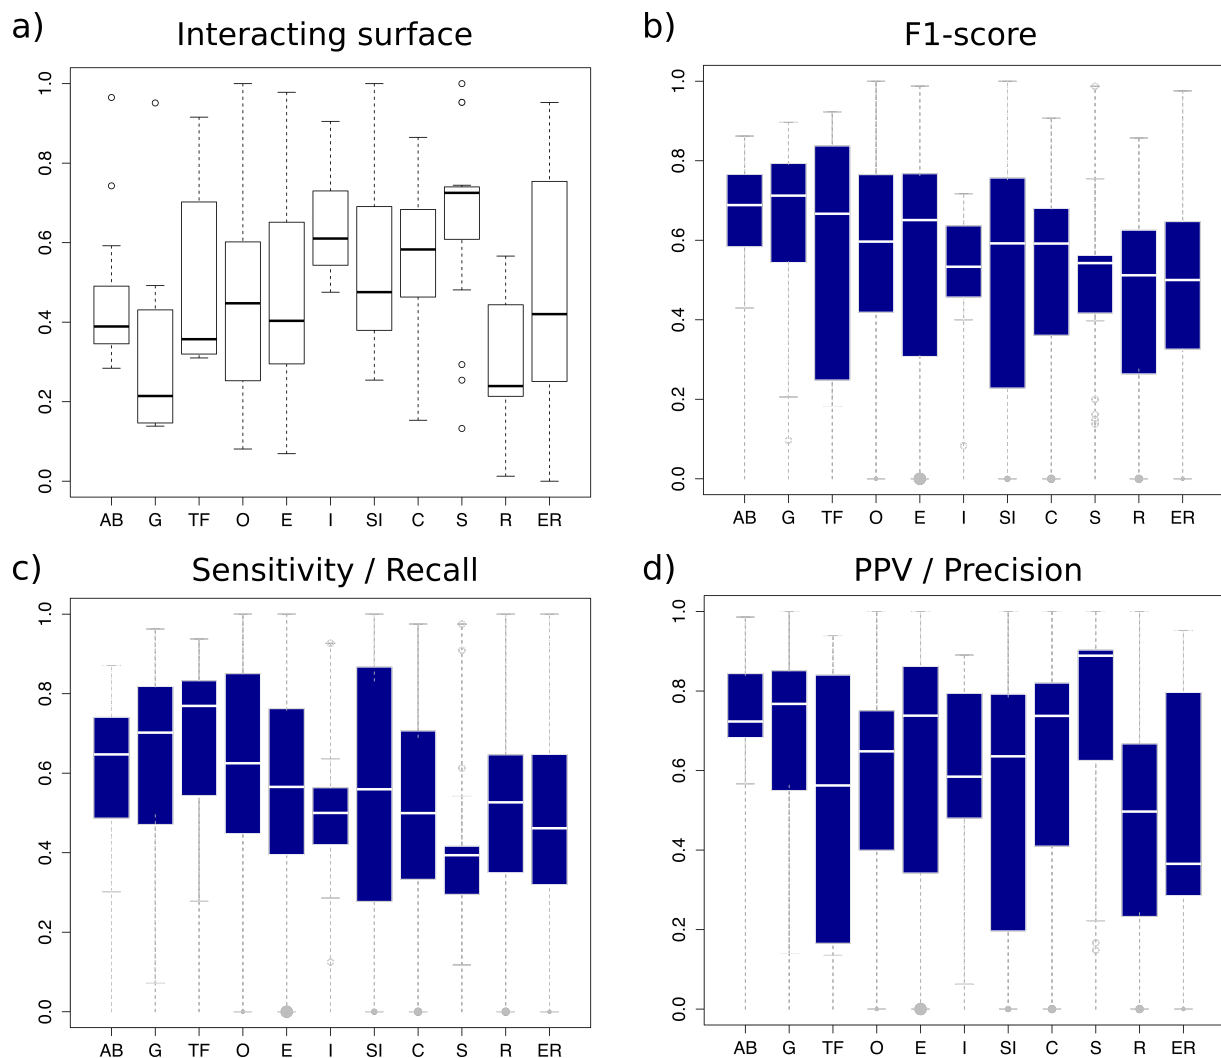

Figure S2: **Statistics computed on the different functional classes:** AB: bound antibodies (16), C: complex subunits (25), E: enzymes (60), ER: enzyme regulators (10), G: G proteins (9), I: antigens from the immune system (6), R: receptors (23), S: structural proteins (24), SI: substrates/inhibitors (16), TF: transcription factors (7) and O: proteins with other function (66). (a) Proportion of protein surface covered by experimental functional interfaces (union of IRs from PPI-262<sub>ext</sub>). (b-d) Agreement between predicted patches and experimental IRs from PPI-262<sub>ext</sub>. For each IR, the best-matching patch or combination of patches is retained. The performance measures are the following: (b) F1-score, (c) sensitivity (recall), (d) positive predicted value (precision). The sizes of the grey dots are proportional to the number of IRs that could not be detected at all.

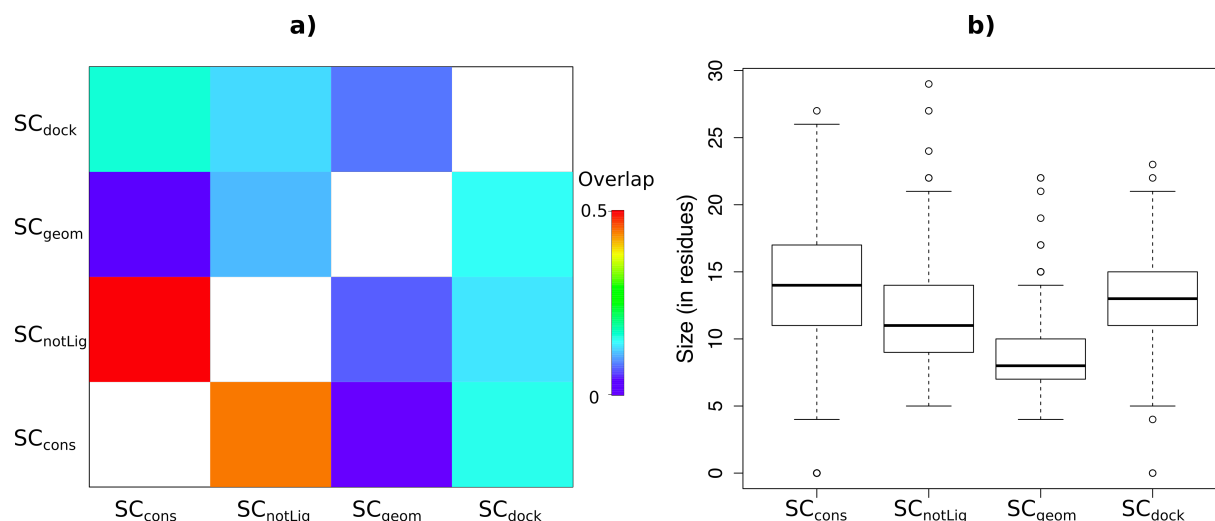

Figure S3: **Characteristic features of the seeds detected by dynJET<sup>2</sup>.** (a) Overlap between seeds generated by the different dynJET<sup>2</sup> scoring schemes, averaged over all proteins from P-262. The overlap is computed as:  $over(i, j) = \frac{|s_i \cap s_j|}{|s_i|}$ , where  $s_i$  is the ensemble of seed residues predicted by the  $i^{th}$  scoring scheme. (b) Distributions of the sizes (in residues) of the seeds predicted by dynJET<sup>2</sup> different scoring schemes.

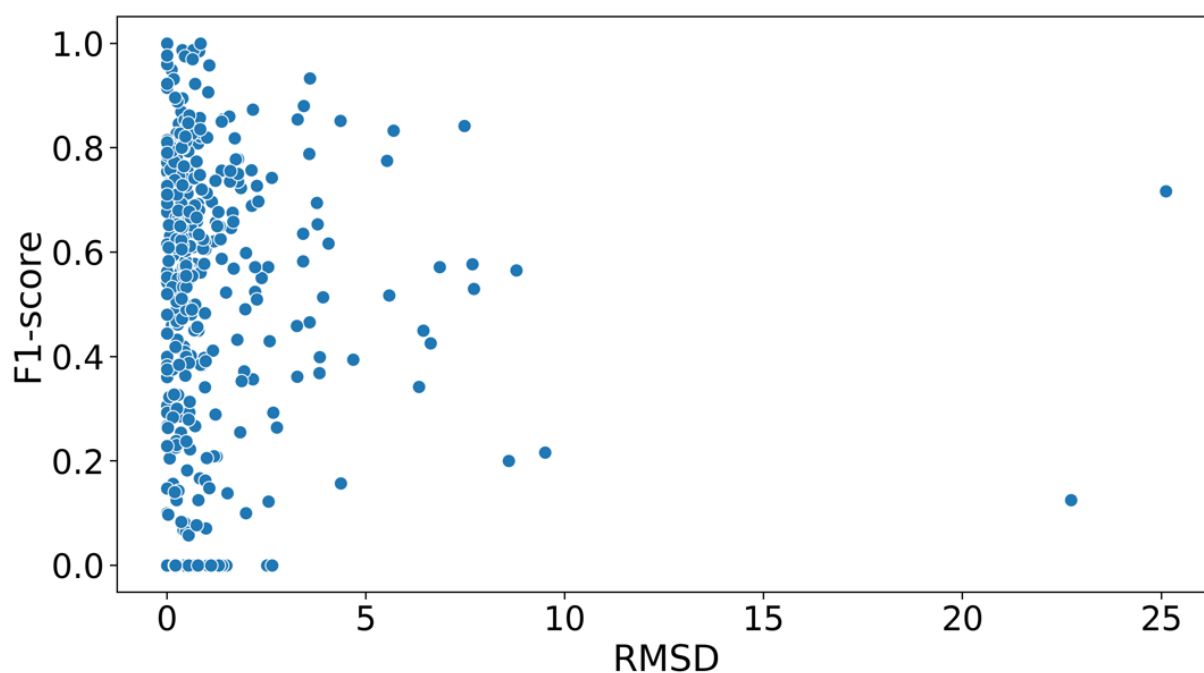

Figure S4: **Representation of the RMSD values compared to the F1-scores.** Each point represents the values obtained for one IR. The RMSD values are computed on the backbone atoms between the query structure from P-262 and each of the homologous structures on which the IR was detected. The F1-score values correspond to the best combination of dynJET<sup>2</sup> predictions.
